# Supplementary material
Source: bioRxiv or medRxiv preprint supplement (https://www.biorxiv.org/highwire/filestream/30779/field_highwire_adjunct_files/5/106948-6.pdf)
Supplement: Supplementary file [file 106948-6.pdf]

**Supplementary Table S6.** Enrichment and depletion levels within imprinted genes

### Body Systems

| Name            | Enrichment ratio | Observed | Expected    |
|-----------------|------------------|----------|-------------|
| endocrine       | 3.209205984      | 8        | 2.492828457 |
| reproductive    | 1.901948558      | 7        | 3.68043603  |
| urinary         | 1.607686395      | 6        | 3.732071142 |
| skeleton        | 1.225846154      | 8        | 6.526104418 |
| respiratory     | 1.185042493      | 6        | 5.063109581 |
| cardiovascular  | 1.165329513      | 7        | 6.006884682 |
| skeletal muscle | 1.158139535      | 8        | 6.907630522 |
| integumentary   | 1.075451741      | 7        | 6.508892714 |
| nervous         | 1.058502024      | 9        | 8.502581756 |
| digestive       | 0.895683453      | 5        | 5.582329317 |
| lymphatic       | 0.493767705      | 1        | 2.025243832 |
| immune          | 0.477534247      | 2        | 4.188181297 |

### Germ Layers

| Name     | Enrichment ratio | Observed | Expected    |
|----------|------------------|----------|-------------|
| endoderm | 1.132737612      | 8        | 7.062535858 |
| ectoderm | 1.088354667      | 10       | 9.188181297 |
| mesoderm | 1.056363636      | 10       | 9.466437177 |

### Organs

| Name            | Enrichment ratio | Observed | Expected    |
|-----------------|------------------|----------|-------------|
| parathyroid     | 5.363076923      | 1        | 0.186460126 |
| vagina          | 3.864745011      | 5        | 1.293746414 |
| diaphragm       | 3.844852941      | 3        | 0.780263913 |
| penis           | 3.789130435      | 7        | 1.847389558 |
| ovary           | 3.740343348      | 5        | 1.336775674 |
| adrenal gland   | 3.708510638      | 3        | 0.808950086 |
| vas deferens    | 3.351923077      | 1        | 0.298336202 |
| fallopian tube  | 3.257943925      | 1        | 0.306942054 |
| pituitary gland | 3.235266821      | 4        | 1.236374068 |

|                  |             |   |             |
|------------------|-------------|---|-------------|
| vulva            | 2.962606232 | 3 | 1.012621916 |
| pancreas         | 2.707572816 | 4 | 1.477337923 |
| meninges         | 2.313716814 | 3 | 1.296615032 |
| wrist            | 2.312985782 | 7 | 3.026391279 |
| breast           | 2.263636364 | 3 | 1.325301205 |
| forehead         | 2.146551724 | 5 | 2.329317269 |
| testis           | 2.105072464 | 5 | 2.375215146 |
| sweat gland      | 2.1         | 2 | 0.952380952 |
| lips             | 2.060283688 | 5 | 2.426850258 |
| prostate         | 1.997707736 | 2 | 1.001147447 |
| elbow            | 1.993898951 | 6 | 3.009179575 |
| abdominal wall   | 1.969491525 | 3 | 1.5232358   |
| knee             | 1.942061281 | 6 | 3.089500861 |
| uterus           | 1.933980583 | 4 | 2.068273092 |
| ankle            | 1.927741935 | 6 | 3.112449799 |
| hip              | 1.927741935 | 6 | 3.112449799 |
| shoulder         | 1.877558348 | 6 | 3.195639702 |
| kidney           | 1.877558348 | 6 | 3.195639702 |
| thyroid          | 1.864171123 | 1 | 0.53643144  |
| fingers          | 1.827522936 | 8 | 4.37751004  |
| lymph nodes      | 1.82513089  | 1 | 0.547905909 |
| fibula           | 1.787692308 | 4 | 2.237521515 |
| neck             | 1.785076811 | 7 | 3.921399885 |
| digit            | 1.778571429 | 8 | 4.497991968 |
| chest wall       | 1.773143438 | 5 | 2.819850832 |
| scapula          | 1.771791614 | 4 | 2.257601836 |
| tibia            | 1.753962264 | 4 | 2.280550775 |
| peripheral nerve | 1.739272986 | 7 | 4.024670109 |
| hand             | 1.718299445 | 8 | 4.655765921 |
| large intestine  | 1.713022113 | 4 | 2.335054504 |
| ulna             | 1.706731946 | 4 | 2.343660356 |
| clavicle         | 1.684057971 | 4 | 2.375215146 |
| radius           | 1.675961538 | 4 | 2.386689616 |

|                 |             |   |             |
|-----------------|-------------|---|-------------|
| rib             | 1.674351585 | 5 | 2.986230637 |
| rib cage        | 1.674351585 | 5 | 2.986230637 |
| sternum         | 1.671942446 | 4 | 2.39242685  |
| heart           | 1.66        | 7 | 4.21686747  |
| toes            | 1.655495251 | 7 | 4.228341939 |
| humerus         | 1.652132701 | 4 | 2.421113024 |
| tongue          | 1.64822695  | 2 | 1.213425129 |
| vertebrae       | 1.647448015 | 5 | 3.034997131 |
| femur           | 1.638542891 | 4 | 2.441193345 |
| pelvis          | 1.580235721 | 5 | 3.164084911 |
| spinal column   | 1.557640751 | 5 | 3.209982788 |
| placenta        | 1.55625     | 1 | 0.642570281 |
| larynx          | 1.542477876 | 2 | 1.296615032 |
| shin            | 1.539072848 | 4 | 2.598967298 |
| upper limb      | 1.539072848 | 8 | 5.197934596 |
| teeth           | 1.500430416 | 3 | 1.999426277 |
| thigh           | 1.492933619 | 4 | 2.679288583 |
| urinary bladder | 1.48974359  | 2 | 1.342512909 |
| ureter          | 1.467789474 | 2 | 1.36259323  |
| small intestine | 1.466760168 | 3 | 2.045324154 |
| intestine       | 1.436045314 | 4 | 2.785427424 |
| forearm         | 1.428688525 | 4 | 2.799770511 |
| foot            | 1.425350467 | 7 | 4.911072863 |
| ear             | 1.406354009 | 8 | 5.688468158 |
| arm             | 1.377865613 | 4 | 2.903040734 |
| cheek           | 1.36171875  | 2 | 1.468732071 |
| skull           | 1.290428345 | 7 | 5.424555364 |
| mandible        | 1.289201183 | 5 | 3.878370625 |
| maxilla         | 1.288248337 | 5 | 3.881239243 |
| blood vessels   | 1.282403433 | 6 | 4.678714859 |
| jaw             | 1.279735683 | 5 | 3.907056799 |
| lower limb      | 1.274255875 | 7 | 5.49340218  |
| spinal cord     | 1.255085509 | 4 | 3.18703385  |

|                           |             |    |             |
|---------------------------|-------------|----|-------------|
| eyelid                    | 1.255085509 | 4  | 3.18703385  |
| brain                     | 1.249462366 | 10 | 8.003442341 |
| stomach                   | 1.239099526 | 3  | 2.421113024 |
| face                      | 1.211117545 | 6  | 4.954102123 |
| pharynx                   | 1.193835616 | 2  | 1.675272519 |
| peripheral nervous system | 1.191503906 | 7  | 5.874928285 |
| mouth                     | 1.163292547 | 6  | 5.157773953 |
| outer ear                 | 1.144201313 | 3  | 2.621916236 |
| head                      | 1.14033366  | 10 | 8.769363167 |
| eye                       | 1.12815534  | 7  | 6.204819277 |
| skin                      | 1.104662743 | 7  | 6.336775674 |
| vocal cords               | 1.092789969 | 1  | 0.915088927 |
| hair                      | 1.063886063 | 3  | 2.819850832 |
| chin                      | 1.006060606 | 2  | 1.987951807 |
| urethra                   | 0.996       | 1  | 1.004016064 |
| lung                      | 0.930841121 | 4  | 4.297188755 |
| heart valve               | 0.866086957 | 2  | 2.309236948 |
| rectum                    | 0.833971292 | 1  | 1.199082042 |
| spleen                    | 0.723236515 | 1  | 1.382673551 |
| liver                     | 0.72173913  | 2  | 2.771084337 |
| white blood cells         | 0.715076923 | 2  | 2.796901893 |
| nose                      | 0.608908297 | 2  | 3.284566839 |
| blood                     | 0.593530079 | 3  | 5.054503729 |
| esophagus                 | 0.482157676 | 1  | 2.074010327 |
| cranial nerve             | 0.457780696 | 2  | 4.368904188 |
| cerebellum                | 0.302341717 | 1  | 3.307515777 |
| middle ear                | 0           | 0  | 1.385542169 |
| inner ear                 | 0           | 0  | 0.711417097 |
| anus                      | 0           | 0  | 0.616752725 |
| bronchus                  | 0           | 0  | 0.840504877 |
| biliary tract             | 0           | 0  | 0.874928285 |
| gallbladder               | 0           | 0  | 0.487664945 |
| olfactory bulb            | 0           | 0  | 0.433161216 |

|                     |   |   |             |
|---------------------|---|---|-------------|
| red blood cells     | 0 | 0 | 2.283419392 |
| coagulation system  | 0 | 0 | 2.111302352 |
| aorta               | 0 | 0 | 0.562248996 |
| bone marrow         | 0 | 0 | 1.179001721 |
| nail                | 0 | 0 | 1.250717154 |
| cerebrospinal fluid | 0 | 0 | 0.814687321 |
| sinuses             | 0 | 0 | 0.347102697 |
| duodenum            | 0 | 0 | 0.545037292 |
| trachea             | 0 | 0 | 0.742971888 |
| epiglottis          | 0 | 0 | 0.438898451 |
| scalp               | 0 | 0 | 0.5794607   |
| lymph vessels       | 0 | 0 | 0.195065978 |
| lacrimal apparatus  | 0 | 0 | 0.255306942 |
| salivary gland      | 0 | 0 | 0.510613884 |
| hypothalamus        | 0 | 0 | 0.370051635 |
| appendix            | 0 | 0 | 0.051635112 |
| thymus              | 0 | 0 | 0.215146299 |

## Body Regions

| Name          | Enrichment ratio | Observed | Expected    |
|---------------|------------------|----------|-------------|
| pelvis        | 1.483404255      | 8        | 5.393000574 |
| abdomen       | 1.38677275       | 8        | 5.768789443 |
| limbs         | 1.377865613      | 8        | 5.806081469 |
| thorax        | 1.32940678       | 9        | 6.76993689  |
| head and neck | 1.103863205      | 10       | 9.059093517 |
| non-specific  | 0.987535411      | 9        | 9.113597246 |

| P-value     | FDR         |
|-------------|-------------|
| 0.00152776  | 0.018333125 |
| 0.048369662 | 0.29021797  |
| 0.125485993 | 0.501943971 |
| 0.215263352 | 0.50256854  |
| 0.305197286 | 0.50256854  |
| 0.293622081 | 0.50256854  |
| 0.268425164 | 0.50256854  |
| 0.381940507 | 0.50925401  |
| 0.335045693 | 0.50256854  |
| 0.359096787 | 0.9997866   |
| 0.23578731  | 0.9997866   |
| 0.08717553  | 0.9997866   |

| P-value     | FDR         |
|-------------|-------------|
| 0.292386988 | 0.292386988 |
| 0.189767052 | 0.284650578 |
| 0.163193952 | 0.284650578 |

| P-value     | FDR         |
|-------------|-------------|
| 0.428104786 | 0.542266839 |
| 0.013344441 | 0.411575456 |
| 0.076776387 | 0.411575456 |
| 0.001862195 | 0.232774405 |
| 0.014825837 | 0.411575456 |
| 0.080977704 | 0.411575456 |
| 0.403131513 | 0.536079139 |
| 0.401695958 | 0.536079139 |
| 0.0491567   | 0.411575456 |

|             |             |
|-------------|-------------|
| 0.111548039 | 0.461548728 |
| 0.072330745 | 0.411575456 |
| 0.155548736 | 0.461548728 |
| 0.02067755  | 0.411575456 |
| 0.160064015 | 0.461548728 |
| 0.076708979 | 0.411575456 |
| 0.080836883 | 0.411575456 |
| 0.255714569 | 0.499646263 |
| 0.085607695 | 0.411575456 |
| 0.264104326 | 0.499646263 |
| 0.062557925 | 0.411575456 |
| 0.191623964 | 0.461548728 |
| 0.068360932 | 0.411575456 |
| 0.142262396 | 0.461548728 |
| 0.070073428 | 0.411575456 |
| 0.070073428 | 0.411575456 |
| 0.076484534 | 0.411575456 |
| 0.076484534 | 0.411575456 |
| 0.384879243 | 0.534328106 |
| 0.036308416 | 0.411575456 |
| 0.384989645 | 0.534328106 |
| 0.165198047 | 0.461548728 |
| 0.062700265 | 0.411575456 |
| 0.041588139 | 0.411575456 |
| 0.126202739 | 0.461548728 |
| 0.167999532 | 0.461548728 |
| 0.171221984 | 0.461548728 |
| 0.069571039 | 0.411575456 |
| 0.049267705 | 0.411575456 |
| 0.17896396  | 0.461548728 |
| 0.18019778  | 0.461548728 |
| 0.184748399 | 0.461548728 |
| 0.18641354  | 0.461548728 |

|             |             |
|-------------|-------------|
| 0.145605805 | 0.461548728 |
| 0.145605805 | 0.461548728 |
| 0.187248187 | 0.461548728 |
| 0.083550213 | 0.411575456 |
| 0.084434366 | 0.411575456 |
| 0.191442179 | 0.461548728 |
| 0.300873065 | 0.505649388 |
| 0.151537565 | 0.461548728 |
| 0.194398577 | 0.461548728 |
| 0.167771051 | 0.461548728 |
| 0.173728479 | 0.461548728 |
| 0.388756872 | 0.534328106 |
| 0.315677728 | 0.505649388 |
| 0.218219967 | 0.487098141 |
| 0.082715767 | 0.411575456 |
| 0.271681028 | 0.499646263 |
| 0.230753261 | 0.497313062 |
| 0.323989289 | 0.505649388 |
| 0.327660803 | 0.505649388 |
| 0.279801907 | 0.499646263 |
| 0.247738328 | 0.499646263 |
| 0.250070683 | 0.499646263 |
| 0.147344398 | 0.461548728 |
| 0.12297765  | 0.461548728 |
| 0.267124734 | 0.499646263 |
| 0.34744871  | 0.520848389 |
| 0.20851968  | 0.482684446 |
| 0.271492006 | 0.499646263 |
| 0.271955962 | 0.499646263 |
| 0.244571721 | 0.499646263 |
| 0.276148531 | 0.499646263 |
| 0.217677006 | 0.487098141 |
| 0.31637588  | 0.505649388 |



|             |             |
|-------------|-------------|
| 0.31637588  | 0.505649388 |
| 0.134507053 | 0.461548728 |
| 0.349458685 | 0.520848389 |
| 0.287267038 | 0.505649388 |
| 0.387898291 | 0.534328106 |
| 0.272775397 | 0.499646263 |
| 0.321243109 | 0.505649388 |
| 0.388990861 | 0.534328106 |
| 0.188931608 | 0.461548728 |
| 0.326707297 | 0.505649388 |
| 0.350010117 | 0.520848389 |
| 0.422361369 | 0.542266839 |
| 0.429356609 | 0.542266839 |
| 0.453704154 | 0.550611838 |
| 0.438715887 | 0.544295063 |
| 0.433843475 | 0.999724838 |
| 0.43639572  | 0.999724838 |
| 0.468444167 | 0.999724838 |
| 0.406652106 | 0.999724838 |
| 0.31689974  | 0.999724838 |
| 0.310849222 | 0.999724838 |
| 0.209947486 | 0.999724838 |
| 0.106720574 | 0.999724838 |
| 0.225513385 | 0.999724838 |
| 0.071241105 | 0.999724838 |
| 0.062338351 | 0.999724838 |
| 0.112291278 | 0.999724838 |
| 0.238800057 | 0.999724838 |
| 0.264321465 | 0.999724838 |
| 0.207572558 | 0.999724838 |
| 0.199891491 | 0.999724838 |
| 0.303077326 | 0.999724838 |
| 0.320922563 | 0.999724838 |

|             |             |
|-------------|-------------|
| 0.037286925 | 0.999724838 |
| 0.046507136 | 0.999724838 |
| 0.280104795 | 0.999724838 |
| 0.142362827 | 0.999724838 |
| 0.13118724  | 0.999724838 |
| 0.213506581 | 0.999724838 |
| 0.297938926 | 0.505649388 |
| 0.285262332 | 0.999724838 |
| 0.230799584 | 0.999724838 |
| 0.319000588 | 0.999724838 |
| 0.275031333 | 0.999724838 |
| 0.179015388 | 0.461548728 |
| 0.22814719  | 0.497313062 |
| 0.295834594 | 0.999724838 |
| 0.314474279 | 0.505649388 |
| 0.050515435 | 0.411575456 |
| 0.195696661 | 0.461548728 |

| <b>P-value</b> | <b>FDR</b>  |
|----------------|-------------|
| 0.09755842     | 0.201146852 |
| 0.130509474    | 0.201146852 |
| 0.134097901    | 0.201146852 |
| 0.123695971    | 0.201146852 |
| 0.193613316    | 0.232335979 |
| 0.412694217    | 0.946192123 |
